# Supplementary material
Source: publisher figshare collection journal article supplement (https://gsapubs.figshare.com/ndownloader/files/23300810)
Supplement: Supplementary file 1 [file 23300810]

Landslides, threshold slopes, and the survival of relict terrain in the wake of the Mendocino Triple Junction  
Georgina L. Bennett et al.

## 1 DATA REPOSITORY

## 2 REGIONAL GEOLOGY

3 The northern California Coast Ranges are composed the Franciscan Complex, a penetratively  
4 sheared set of metasedimentary rocks forming an accretionary prism. The Franciscan complex is  
5 subdivided into three broad belts that young to the west: the Eastern, Central and Coastal belts,  
6 reflecting the cumulative accretion of oceanic sediments to western North America (McLaughlin  
7 et al., 2000). Our study area encompasses the Central and Coastal belts, described further here.

8 The Central belt consists predominantly of Franciscan Mélange (KJf in Fig. 1A and DR1), which  
9 is a penetratively sheared, Jurassic-Cretaceous, argillitic mélange embedded with blocks of more  
10 coherent sandstone and shale turbidites and occasional blocks of metabasalt and others. The  
11 younger Coastal belt can be divided into several structural terranes. Most relevant for our study  
12 area are the Yager terrane (EP in Fig. DR1), and Coastal terrane (TK in Fig. DR1). The Yager  
13 terrane is composed predominantly of Paleocene to Eocene argillite, sandstone and conglomerate  
14 that vary from well bedded to sheared. The Coastal terrane is compositionally similar to the  
15 Yager, but is more penetratively disrupted and sheared and contains some additional lithologies  
16 such as blocks of basalt. Rocks of the Coastal terrane span the late Cretaceous to Pliocene.

## 17 METHODS

### 18 Landslide mapping

19 Fisher et al. (2012), demonstrated the accuracy of Google Earth (GE) for mapping landslides in  
20 Haiti, observing that landslides mapped using GE in New Zealand match up very well with those  
21 previously mapped from multiple individually orthorectified aerial photographs. They promote  
22 the use of GE for several earth science applications including landslide mapping, especially for  
23 large areas for which commercial imagery is expensive and time consuming to process. We

followed suit by mapping ~3000 landslides in our study area using GE. We used mostly 2012 GE aerial photographs, the most recent imagery available at the time of mapping to identify landslides, calibrating our mapping visually on 69 earthflows mapped by Mackey and Roering (2011) in the Eel catchment. We used a suite of older imagery available in GE (Table DR1) to assess the activity of earthflows and where possible measure earthflow velocity from displaced features (Fig. DR3; Fig. DR4). Dormant earthflows have a number of features also characteristic of active earthflows such as gullies and a lower density of vegetation, but critically do not display any recent surface disturbance such as scarps and had no detectable movement. Following completion of our landslide inventory, 2014 GE aerial imagery became available. We used this to check our inventory especially in areas affected by wildfire smoke in 2012 imagery.

#### **Landslide erosion rate calculation**

Earthflow depth was calculated from mapped area as  $Z=\alpha A^{\gamma}$ , where  $Z$  is landslide depth,  $\alpha$  is a fit parameter,  $A$  is area, and  $\gamma$  is the power-law exponent (Handwerger et al., 2013). We used parameter values of  $\gamma=0.29$  (0.22, 0.36) and  $\alpha=0.46$  (0.051, 0.87) calculated by Handwerger et al. (2013) using a non-linear least squares regression ( $R^2=0.45$ ) of the depths and areas of 69 landslides in the Eel River measured by Mackey and Roering (2011). We calculated the empirical scaling relationship between area and width measurements of the same 69 landslides of Mackey and Roering (2011) using non-linear least squares regression. The relationship takes the form of  $W=\delta A^{\beta}$ , where  $\delta=0.86$  (0.52, 1.19) and  $\beta=0.44$  (0.41, 0.47), with an  $R^2=0.85$  (Fig. DR5). We used this relationship to calculate the earthflow width from mapped area. We converted debris slide area into volume using the empirical scaling relationship between landslide area and volume,  $V=\alpha A^{\delta}$ , and using parameter values for soil-based slides in northern California presented in Larsen et al. (2010) of  $\alpha= -0.49\pm0.02$  and  $\delta=1.19\pm0.008$ . Finally, erosion

rates were calculated by first converting flux to a sediment yield ( $\text{metric t km}^{-2} \text{ yr}^{-1}$ ) assuming a density of earthflow colluvium of  $2.1 \text{ g cm}^{-3}$  (Kelsey, 1978; Mackey et al., 2009). This is then converted into a rock erosion rate assuming a bedrock density of  $2.5 \text{ g cm}^{-3}$  (Mackey and Roering, 2011) and given an averaging area of either swaths along the MCC transect (Fig. 2, Fig. DR6), swaths along individual catchments (e.g. Fig. 4) or subcatchments (Fig. 3, Fig. DR8).

## **Uncertainty in earthflow erosion rates**

Uncertainty in earthflow erosion rates may originate from human mapping error, the scaling relationships used to convert earthflow area into width and depth, uncertainty in parameter values within these scaling relationships, and lastly in the velocity measurements. For other limitations in our approach see Mackey and Roering (2011). We account for uncertainty in scaling parameter values and our velocity measurements, whilst recognizing that the other two sources may also contribute to uncertainty. We produce three erosion rate estimates, a mean rate using mean values of scaling parameters and not considering uncertainty in earthflow velocity, and upper and lower rates bracketing this that do consider these uncertainties. We account for uncertainty in area-width and area-depth scaling parameter values using the 5 and 95% confidence interval values from the regressions of width and depth with area described above. We made an assessment of the average error of our velocity measurements by measuring the displacement of stable features, mainly buildings, between imagery used to measure earthflow velocity. We measured displacements of 141 stable points between multi-temporal imagery arriving at an average annual displacement (error) of  $0.2 \text{ m yr}^{-1}$ , which is a lower detection limit for active earthflows. In the calculation of the upper erosion rate we add this error to each velocity measurement and in the calculation of lower erosion rate we subtract it.

## **Uncertainty in debris slide erosion rates**

Uncertainty in our debris slide erosion rates may originate from human mapping error, the scaling relationship used to convert debris slide area into volume, uncertainty in the parameter values in the scaling relationship, and the number of years over which debris slide flux is averaged to obtain an annual flux. Here we account for uncertainty in parameter values in the area-volume scaling relationship presented above and in the estimated age of the debris slide inventory. We use the mean and 5/95% confidence interval parameter values in area-volume scaling in our median, lower and upper erosion rate estimates respectively. We consider two possible end members of 10 and 30 years for debris slide inventory age based on a visual assessment of debris slide longevity in the landscape (e.g., Larsen and Montgomery, 2012) (Fig. DR2). We found evidence of some debris slides that are almost completely re-vegetated within ~10 years (e.g., Fig. DR2A-C). However, a number of slides that occurred before the start of our study period ~1990 are still clearly visible (e.g., Fig. DR2D,E). Considering uncertainty in these age estimates we produce two estimates of debris slide erosion rates and total landslide erosion rates.

## **Channel analysis**

We adapted Topotoolbox 2 (Schwanghart and Scherler, 2014) to extract normalized channel steepness index ( $k_{sn}$ ) for the channel network from an 10 m USGS National Elevation Dataset (NED) digital elevation model (Wobus et al., 2006). To reduce noise from DEM artifacts, we smoothed channel elevations with a 100 m long moving filter. The filter we used (“filtfilt” in Matlab) reproduces more faithful elevations near confluences than the commonly used boxcar filter (e.g., Wobus et al., 2006), which can produce steps (or virtual hanging valleys) at tributary junctions. Normalized channel steepness index was calculated within a 1000 m long moving

window and a reference concavity of 0.55 for the Eel River basin following Shi (2011). Knickpoints were identified using an automated method that scanned every channel in the stream network, arbitrarily designated as cells on the DEM with upstream drainage areas  $>1 \text{ km}^2$ . Knickpoints were identified wherever the ratio between downstream and upstream  $k_{sn}$  averaged within two serial windows (each 2 km long) exceeded a factor of two. This ratio was determined to be the minimum ratio associated with most migratory knickpoints (22 out of 23) manually by Shi (2011), while at the same time avoiding a large fraction of likely anchored knickpoints either pinned to lithologic contacts between rock units with contrasting erodibilities or created by landslides (13 out of 29 static knickpoints steepen by a factor less than 2). Where adjacent DEM cells along the channel all met this criterion, the cell between two windows with the largest downstream-upstream ratio was marked as the knickpoint. To further avoid false positives associated with static knickpoints, we conservatively avoided knickpoints within 0.5 km (Euclidean distance) of a mapped lithologic contact (Saucedo et al., 2000).

## **FURTHER DISCUSSION**

Lock et al. (2006) propose a modified version of Furlong and Govers' (1999) 'single hump' isostatic uplift model (Fig.2A,B), termed the 'double hump' model (Lock et al., 2006, their figure 5) that incorporates an additional component of flexure and dynamic topography in the modeled uplift field. Lock et al. (2006) suggest that this model can better explain the modern day regional topography and planform drainage pattern. However, as they acknowledge, they lack a rigorous test of the uplift field based on geomorphic erosion rates. Our study is the first to offer these constraints in the form of regional landslide erosion rates and channel steepness indices. Our data are consistent with a broad zone of increased uplift due to crustal thickening alone

(Furlong and Govers, 1999) and does not require that a double humped pattern be invoked (Fig. DR6C).

Our analysis of landslide erosion rates sheds new light on the interpretation of cosmogenic nuclide erosion rates in the South Fork Eel (Willenbring et al., 2013). We observe that landslide erosion rates in subcatchments of the SF Eel (Fig. 2E; Fig. DR8A) increase upstream, in contrast to cosmogenic erosion rates. Our data suggest that the downstream increase in cosmogenic erosion rate results from the increased contribution of sediment from landslides, particularly earthflows, from adjusting tributaries within the highly Franciscan Mélange, and not just from a decreasing area of relict terrain as Willenbring et al. (2013) suggest.

#### **FURTHER REFERENCES**

Fisher, G. B., Amos, C. B., Bookhagen, B., Burbank, D. W., and Godard, V., 2012, Channel widths, landslides, faults, and beyond: The new world order of high-spatial resolution Google Earth imagery in the study of earth surface processes: Geological Society of America Special Papers, v. 492, p. 1–22, doi:10.1130/2012.2492(01).

Mclaughlin, R. J., Ellen, S. D., Blake, J. M. C., Jayko, A. S., Irwin, W. P., Aalto, K. R., ... Clark, J. S. H. (2000). Geology of the Cape Mendocino, Eureka, Garberville, and Southwestern part of the Hayfork 30 x 60 Minute Quadrangles and Adjacent Offshore Area, Northern California. Miscellaneous Field Studies MF-2336, 2000–2000.

Jennings, C. W., 1977, Geologic map of California, Geologic Data Map Series Map 2, scale 1:750000. Sacramento, California.

Saucedo, G. J., Bedford, D. R., Raines, G. L., Miller, R. J., Wentworth, C. M. (2000). GIS Data

for the Geologic Map of California. Sacramento, California.

Schwanghart, W., and Scherler, D., 2014, Short Communication: TopoToolbox 2 – MATLAB-based software for topographic analysis and modeling in Earth surface sciences: Earth Surface Dynamics, vol. 2, no. 1, p. 1–7, doi:10.5194/esurf-2-1-2014.

Table DR1. Google Earth imagery used to map landslides and measure earthflow velocities.

| Date       | Image type                     | Source                   |
|------------|--------------------------------|--------------------------|
| 8/24/1988  | Digital orthophoto quadrangles | USGS                     |
| 5/31/1993  | Digital orthophoto quadrangles | USGS                     |
| 6/11/1993  | Digital orthophoto quadrangles | USGS                     |
| 6/12/1993  | Digital orthophoto quadrangles | USGS                     |
| 8/11/1998  | Digital orthophoto quadrangles | NAPP                     |
| 11/20/2004 | Satellite image                | Digital Globe            |
| 6/11/2005  | Digital orthophoto quadrangles | USDA Farm Service Agency |
| 5/3/2006   | Satellite image                | Digital Globe            |
| 5/24/2009  | Satellite image                | USDA Farm Service Agency |
| 4/24/2010  | Digital orthophoto quadrangles | USDA Farm Service Agency |
| 8/23/2012  | Aerial photo                   | Google                   |
| 7/9/2012   | Aerial photo                   | Google                   |
| 7/10/2012  | Aerial photo                   | Google                   |
| 5/28/2014  | Aerial photo                   | Google                   |
| 5/30/2014  | Aerial photo                   | Google                   |

Table DR2. Landslide erosion rates broken down by landslide type. Mean erosion rates are those calculated using mean values of scaling parameters in earthflow area-depth, area-width and debris slide area-volume relationships, and not considering uncertainty in velocity measurements. Upper erosion rates are calculated using the 95% parameter values in geometrical scaling relationships of earthflows and debris slides and upper velocity estimates of earthflows. Lower erosion rates are calculated using the 5% parameter values in geometrical scaling relationships and lower velocity estimates of earthflows. The mean value we report in the text is the mean of the values in bold, i.e.  $0.18 \pm 0.04 \text{ mm yr}^{-1}$ .

| Study area      | Rock erosion rate ( $\text{mm yr}^{-1}$ ) |                    |                  |                   |                    |                                      |                                      | Total landslide flux (10 yr) ( $\text{t km}^{-2} \text{ yr}^{-1}$ ) |
|-----------------|-------------------------------------------|--------------------|------------------|-------------------|--------------------|--------------------------------------|--------------------------------------|---------------------------------------------------------------------|
|                 | Active earth flow                         | Dormant earth flow | Total earth flow | Debris slide 30yr | Debris slide 10 yr | Total landslide erosion rate (10 yr) | Total landslide erosion rate (30 yr) |                                                                     |
| Upper           | 0.383                                     | 0.449              | 0.832            | 0.047             | 0.141              | 0.972                                | 0.879                                | 2042                                                                |
| Mean            | 0.056                                     | 0.043              | 0.098            | 0.040             | 0.120              | <b>0.218</b>                         | <b>0.138</b>                         | 457.8                                                               |
| Lower           | 0.001                                     | 0.001              | 0.001            | 0.035             | 0.105              | 0.106                                | 0.036                                | 223.2                                                               |
| <b>KJf only</b> |                                           |                    |                  |                   |                    |                                      |                                      |                                                                     |
| Upper           | 0.649                                     | 0.763              | 1.413            | 0.054             | 0.163              | 1.575                                | 1.467                                | 1575                                                                |
| Mean            | 0.094                                     | 0.072              | 0.166            | 0.046             | 0.138              | 0.304                                | 0.212                                | 304.4                                                               |
| Lower           | 0.001                                     | 0.001              | 0.002            | 0.040             | 0.121              | 0.123                                | 0.043                                | 123.3                                                               |
| <b>Eel only</b> |                                           |                    |                  |                   |                    |                                      |                                      |                                                                     |
| Upper           | 0.455                                     | 0.643              | 1.098            | 0.067             | 0.200              | 1.297                                | 1.164                                | 2725                                                                |
| Mean            | 0.064                                     | 0.061              | 0.125            | 0.057             | 0.170              | 0.295                                | 0.181                                | 618.6                                                               |
| Lower           | 0.001                                     | 0.001              | 0.002            | 0.050             | 0.149              | 0.151                                | 0.051                                | 316.2                                                               |

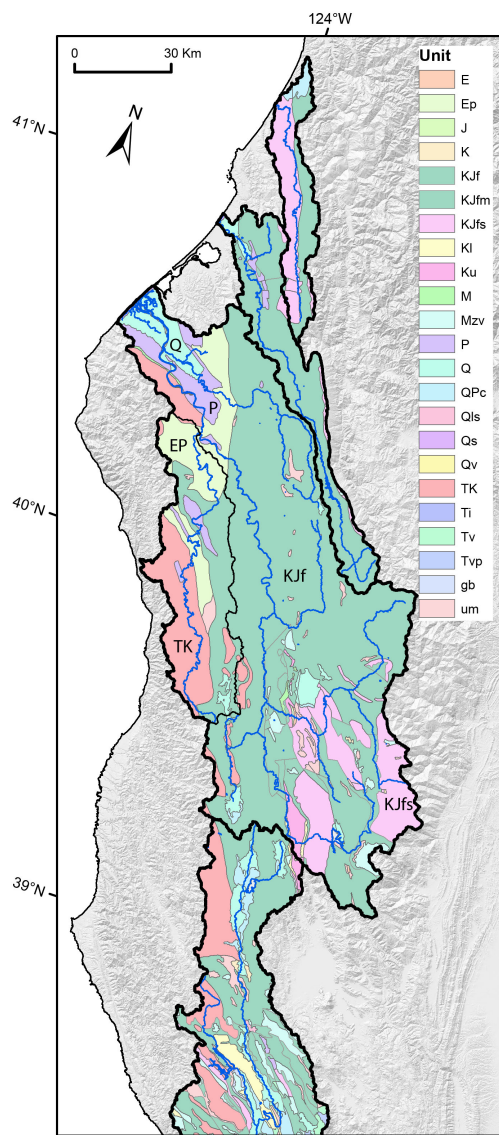

Figure DR 1 – Geological map of the Franciscan Complex adapted from Saucedo et al. (2000), clipped to our four study catchments. The South Fork Eel catchment within the Eel Catchment is also delineated. The main units referred to in the DR are indicated.

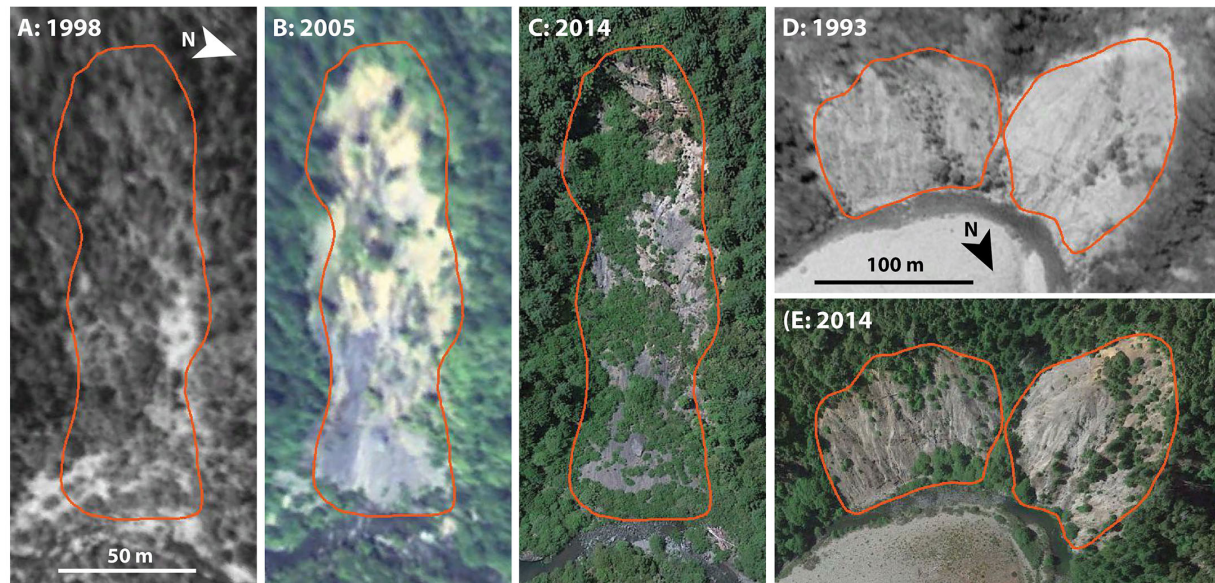

Figure DR2. Examples of debris slides and their re-vegetation. A – C show a debris slide that occurred sometime between 1998 and 2005 and is mostly re-vegetated by 2014, i.e. within ~10 years. D–E show a debris slide that occurred prior to 1993 and is still clearly exposed in 2014, suggesting a re-vegetation time longer than 20 years.

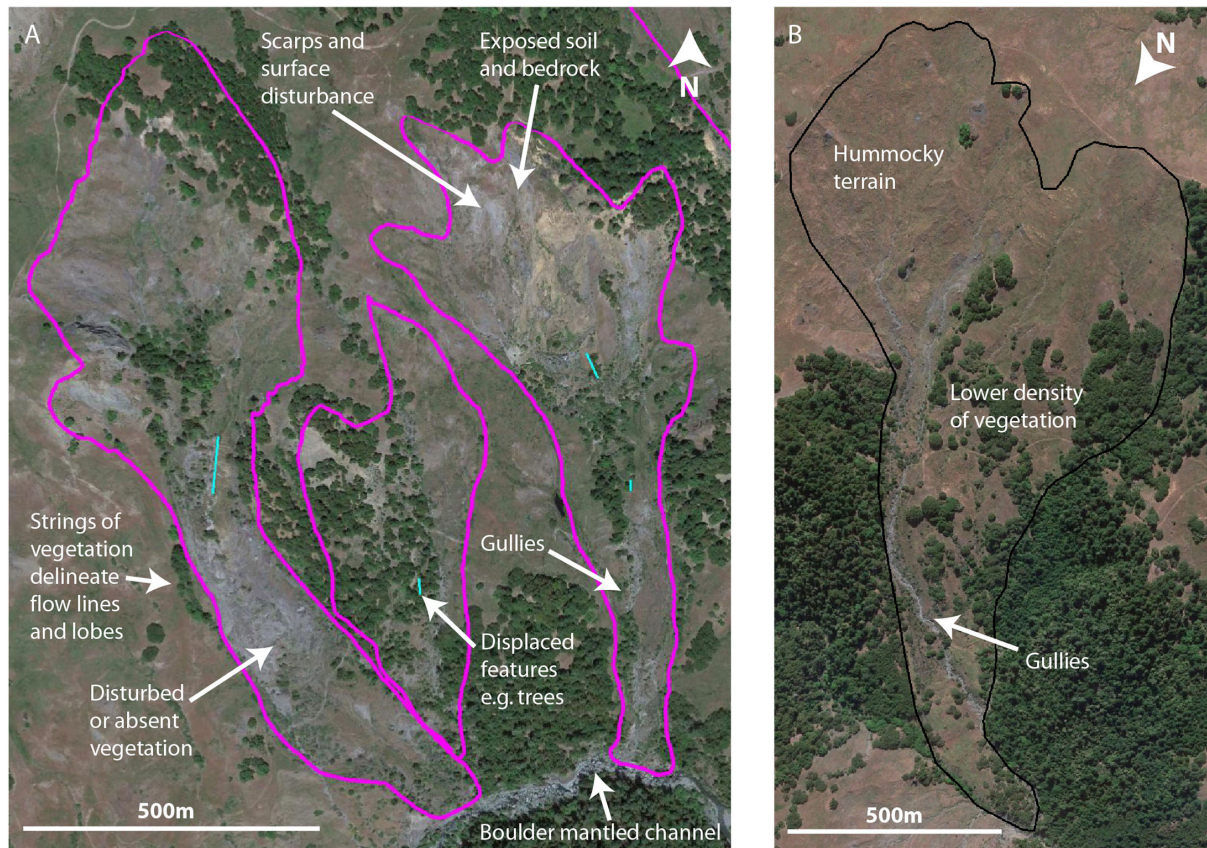

Figure DR3. A: Active earthflows along the Van Duzen tributary of the Eel River showing characteristic morphology and disturbance features used to map active earthflows from Google Earth imagery. B: A characteristic dormant earthflow in the Eel catchment.

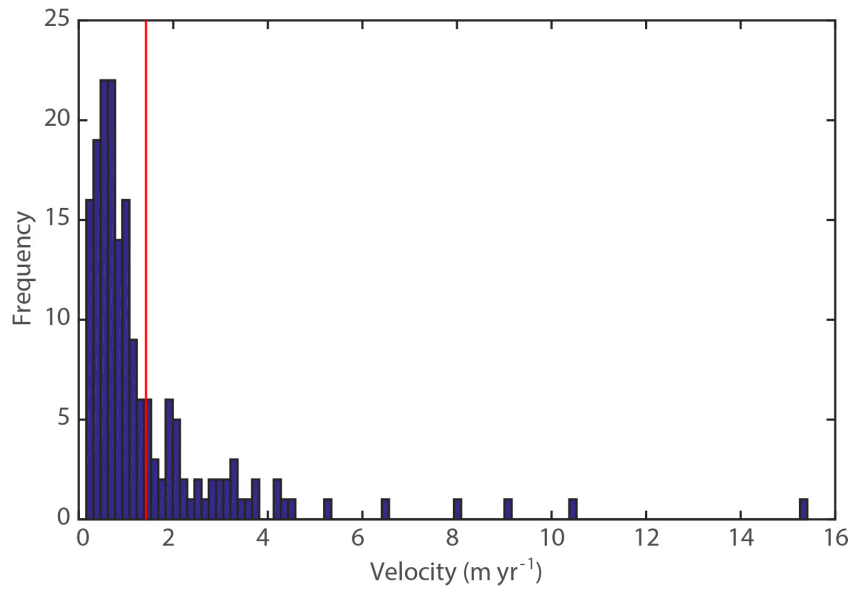

Figure DR4. Histogram of measured earthflow velocities above the detection limit of 0.2 m yr<sup>-1</sup>. Mean earthflow velocity of 1.44 m yr<sup>-1</sup> is marked in red.

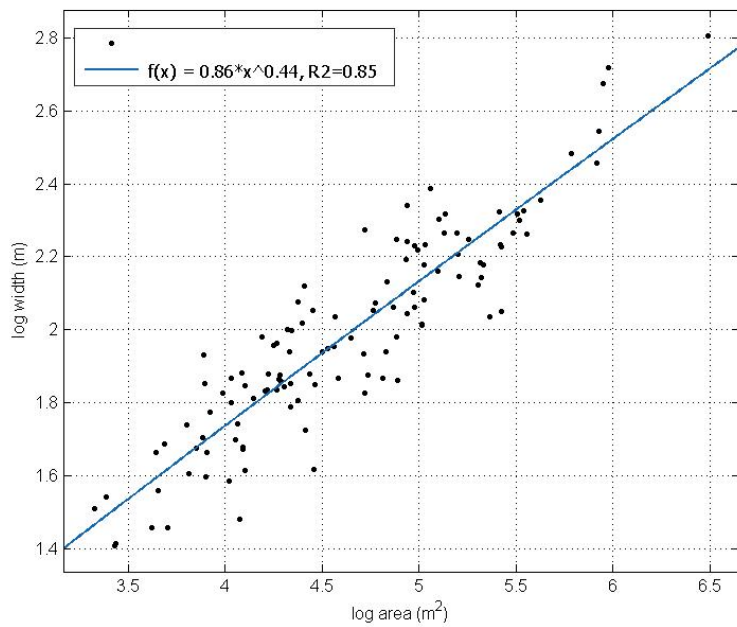

Figure DR5. Empirical scaling relationship between width and area of 69 earthflows mapped by Mackey and Roering (2011) in the Eel. See text for more details.

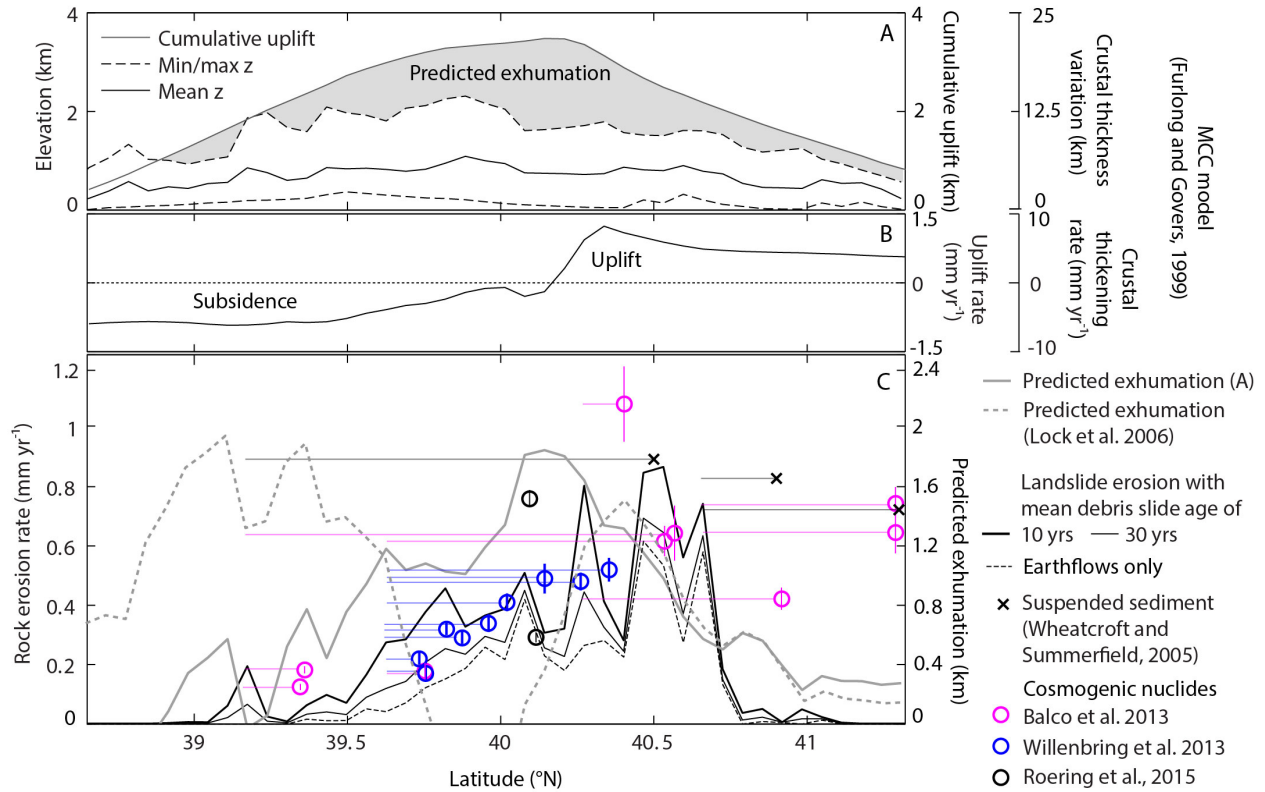

175

176 Figure DR6. Expanded version of Fig. 2 showing extra details in derivation of uplift curves and  
 177 landslide erosion rate. A: Observed elevation and modeled cumulative uplift as calculated from  
 178 MCC-modeled crustal thickness variation (Furlong and Govers, 1999) assuming local isostasy  
 179 and a typical density variation between the crust and the mantle (Lock et al., 2006). Crustal  
 180 thickness variation is calculated by Furlong and Govers (1999) by integrating their MCC-  
 181 modeled crustal thickening rate shown in panel B. B: Predicted uplift rate calculated from the  
 182 MCC-modeled crustal thickening rate assuming local isostasy and a typical density variation. C:  
 183 Swath-averaged landslide erosion rates within KJf compared to cosmogenic nuclide erosion  
 184 rates, suspended sediment erosion rates and predicted exhumation as depicted in panel A, and  
 185 predicted exhumation based on the ‘double-hump’ model of Lock et al. (2006). The tails on  
 186 cosmogenic and suspended sediment erosion rates depict the upstream area over which these  
 187 rates integrate.

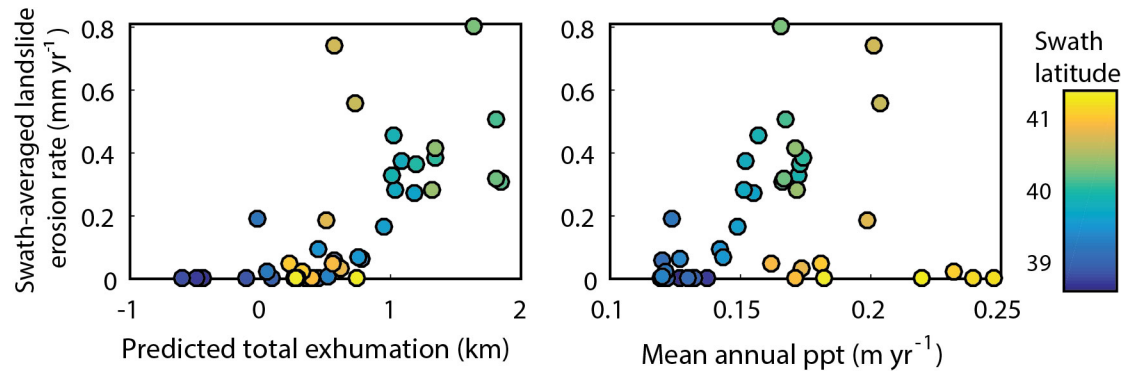

188  
189

190 Figure DR 7 – A: Relationship of swath-averaged landslide erosion rate in KJf with predicted  
191 exhumation (see Fig DR6) and B: with mean annual precipitation obtained from PRISM for 1981  
192 - 2010.

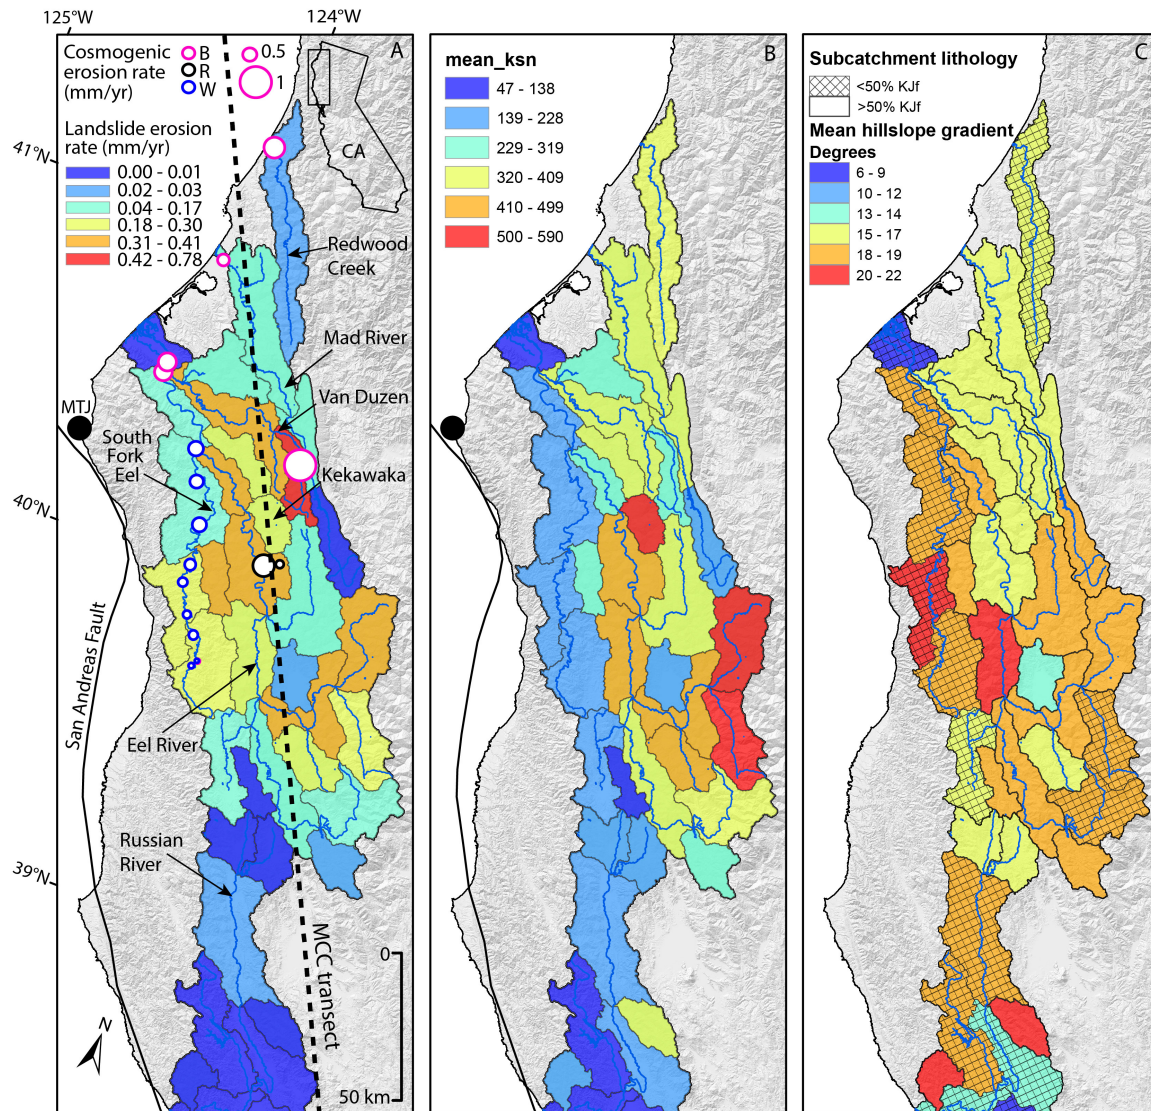

Figure DR8. A: Landslide erosion rates measured in this study averaged by USGS-defined subcatchments within the 4 study catchments spanning the MCC model domain (Redwood, Mad, Eel and Russian) for comparison with published cosmogenic nuclide erosion rates (B = Balco et al. (2013); R = Roering et al. (2015); W = Willenbring et al. (2013)). B: Mean  $k_{sn}$  by subcatchment. C: Mean hillslope gradient by subcatchment. Subcatchments with >50% KJf lithology, used in Fig. 3, are highlighted (no cross-hatching).

201

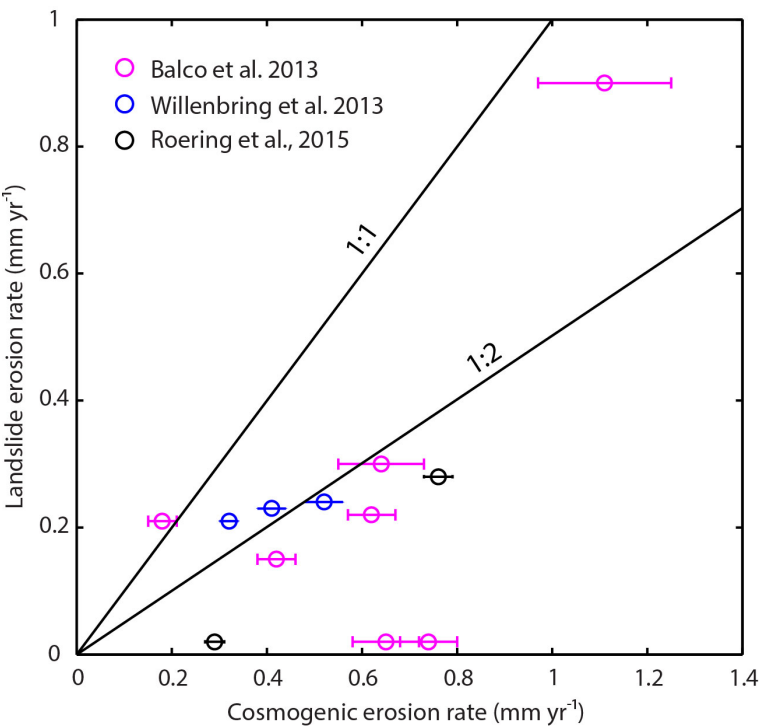

202

203 Figure DR9. Landslide erosion rates averaged by (sub)catchment areas corresponding to  
204 cosmogenic nuclide erosion rates. Landslide erosion rate tend to lie on the 1:2 line with  
205 cosmogenic erosion rates.

206

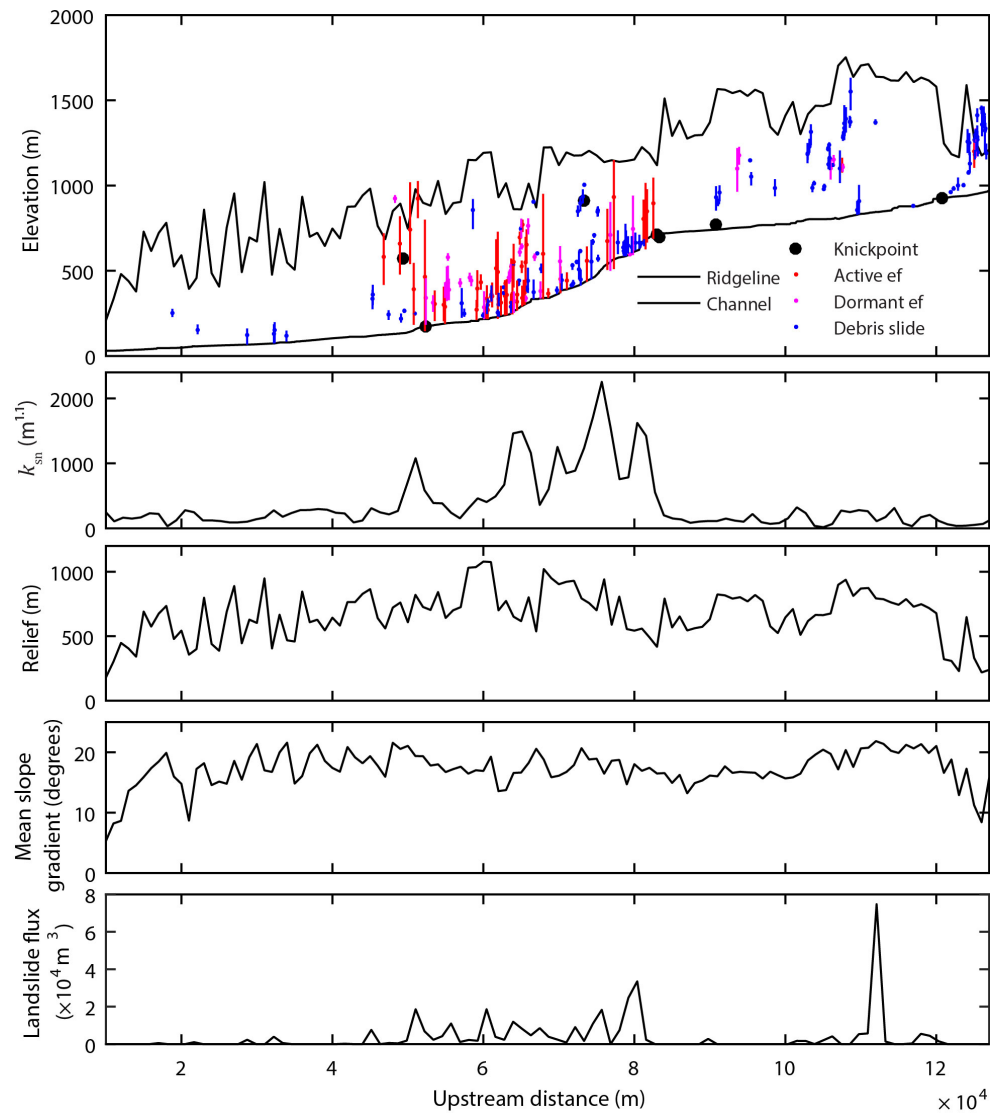

207

208 Figure DR 10 – Landslides and topography along the Van Duzen, KJf-dominated tributary of the

209 Eel (see Fig. DR8 for location).

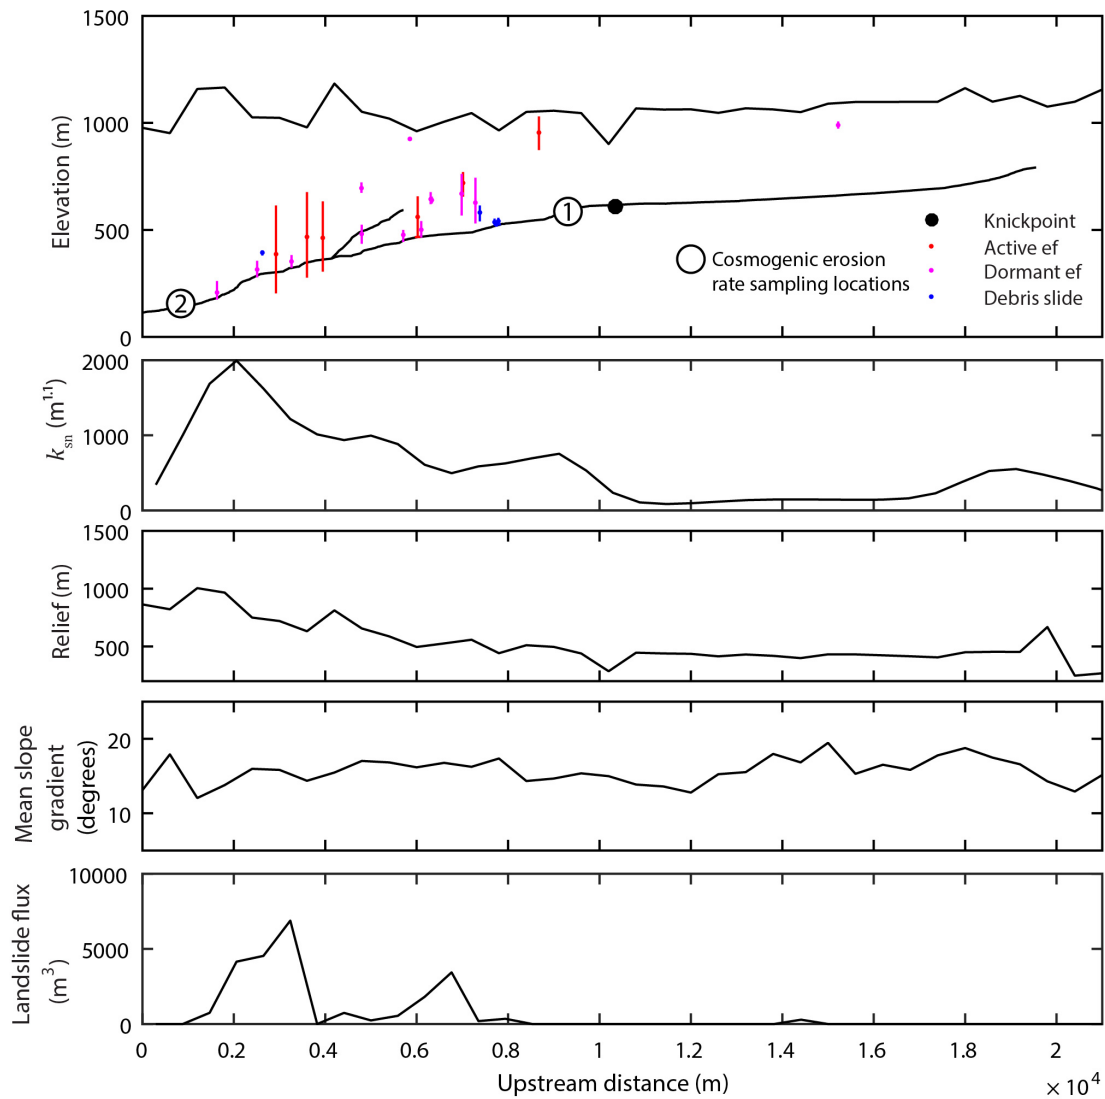

210

211 Figure DR11 – Landslides and topography along the Kekawaka, KJf-dominated tributary of the

212 Eel (see Fig. DR8 for location). 1 and 2 refer to cosmogenic erosion rate labels in Fig. 3C.

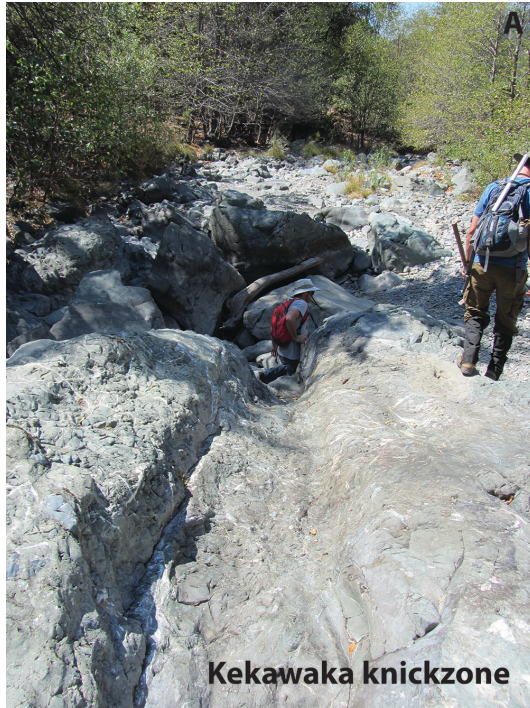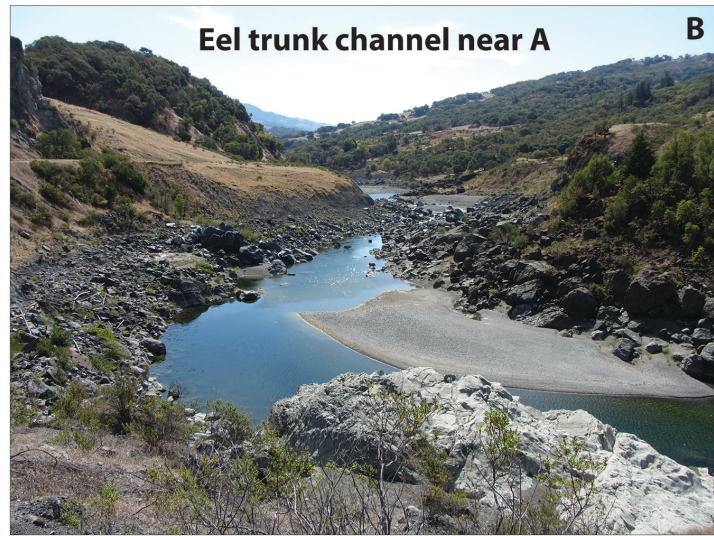

213  
214

215 Figure DR12 – A: Megaclasts of >10 m along the Kekawaka landslide-lined knickzone (Fig.  
216 DR11). B: Boulder-mantled earthflow toes along the main Eel channel near the junction of the  
217 Kekawaka.
